# Supplementary material for: Prognostic impact of gross tumor volume during radical radiochemotherapy of locally advanced non-small cell lung cancer—results from the NCT03055715 multicenter cohort study of the Young DEGRO Trial Group
Source: PubMed Central journal article supplement (PMC8062351; doi:10.1007/s00066-020-01727-4), 2021-01-07
Supplement: 66_2020_1727_MOESM2_ESM.pdf [file 66_2020_1727_MOESM2_ESM.pdf]

Both parameters

| N=176          | Crude model       |      | Adjusted model    |      | Adjusted model 2* |      |
|----------------|-------------------|------|-------------------|------|-------------------|------|
| GTV1 per 300mL | 0.71 (0.36- 1.38) | ns   | 0.69 (0.32- 1.49) | ns   | 0.71 (0.33- 1.54) | ns   |
| GTV2 per 300mL | 3.18 (1.07- 9.45) | 0.04 | 3.86 (1.06- 14.0) | 0.04 | 3.7 (1.01- 13.52) | 0.04 |

Adjusted for T-stage, chemotherapy, age, RT-dose, histology (Adeno or squamosa), grading, pulmonary comorbidities.

Model 2: Additional adjustment for PET-CT or PET + CT coregistered (Fusion)

Change: absolute or relative

| N=176             | Adjusted (absolute) |      |                  | Adjusted (relative) |    |
|-------------------|---------------------|------|------------------|---------------------|----|
| Decrease per 50ml | 0.8 (0.64- 0.99)    | 0.04 | Decrease per 50% | 0.75 (0.47- 1.21)   | ns |

Adjusted for T-stage, chemotherapy, age, RT-dose, histology (Adeno or squamosa), grading, pulmonary comorbidities

No change in effect estimates after adjustment for PET-CT
